# Supplementary material for: Access to facility delivery and caesarean section in north-central Liberia: a cross-sectional community-based study
Source: PubMed Central journal article supplement — BMJ Open. 2012 Nov 3;2(6):e001602. doi: 10.1136/bmjopen-2012-001602 (PMC3532996; doi:10.1136/bmjopen-2012-001602), 2012-11-03
Supplement: bmjopen-2012-001602.draft_revisions.pdf [file bmjopen-2012-001602.draft_revisions.pdf]

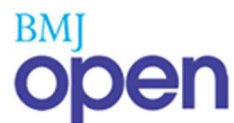

## Access to key maternal health services in north-central Liberia

|                                 |                                                                                                                                                                                                                                                                                                                                                                                    |
|---------------------------------|------------------------------------------------------------------------------------------------------------------------------------------------------------------------------------------------------------------------------------------------------------------------------------------------------------------------------------------------------------------------------------|
| Journal:                        | <i>BMJ Open</i>                                                                                                                                                                                                                                                                                                                                                                    |
| Manuscript ID:                  | bmjopen-2012-001602                                                                                                                                                                                                                                                                                                                                                                |
| Article Type:                   | Research                                                                                                                                                                                                                                                                                                                                                                           |
| Date Submitted by the Author:   | 04-Jun-2012                                                                                                                                                                                                                                                                                                                                                                        |
| Complete List of Authors:       | Gartland, Matthew; Vanderbilt University, Vanderbilt Institute for Global Health<br>Taryor, Victor; Ganta United Methodist Hospital, Ganta, Liberia,<br>Norman, Andy; Vanderbilt University School of Medicine, Obstetrics and Gynecology<br>Vermund, Sten; Vanderbilt University School of Medicine, Pediatrics;<br>Vanderbilt University, Vanderbilt Institute for Global Health |
| <b>Primary Subject Heading</b>: | Global health                                                                                                                                                                                                                                                                                                                                                                      |
| Secondary Subject Heading:      | Reproductive medicine, obstetrics and gynaecology, Public health                                                                                                                                                                                                                                                                                                                   |
| Keywords:                       | Liberia, Maternal health, Health care utilization, Emergency obstetric care                                                                                                                                                                                                                                                                                                        |
|                                 |                                                                                                                                                                                                                                                                                                                                                                                    |

SCHOLARONE™  
Manuscripts

## STRUCTURED ABSTRACT

**Objective:** Rural north-central Liberia has one of the world's highest maternal mortality ratios. We studied health facility birthing service utilization and the motives of women seeking or not seeking facility-based care in north-central Liberia.

**Design:** Cross-sectional community-based structured interviews and health facility medical record review.

**Setting:** A regional hospital and the surrounding communities in rural north-central Liberia.

**Participants:** A convenience sample of 307 women between 15-49 years participated in structured interviews. 1031 deliveries performed in the regional hospital were included in the record review.

**Primary outcomes:** Delivery within a health facility and cesarean delivery rates were used as indicators of direct utilization of care and as markers of availability of maternal health services.

**Results:** Of 280 interview respondents with a prior childbirth, only 47 (16.8%) delivered their last child in a health facility. Women who did not use formal services cited cost, sudden labor, and family tradition or religion as their principal reasons for home delivery. At the regional hospital, the cesarean delivery rate was 35.5%. Major indications included cephalopelvic disproportion (50.0%) and antepartum hemorrhage (10.2%).

**Conclusions:** There is an enormous unmet need for maternal health services in north-central Liberia. Greater outreach and referral services as well as community-based education among women, family members, and traditional birth attendants are vital to improve the timely utilization of care.

## INTRODUCTION

1  
2  
3 In 2008 an estimated 342,900 women died in childbirth worldwide.[1] A vast global disparity  
4 exists, with more than 99% of maternal deaths taking place in low and middle-income countries  
5 (LMIC). The maternal mortality ratio (MMR) represents the number of maternal deaths per  
6 100,000 live births. MMR has decreased in Asia and Latin America in the past two decades, but  
7 has remained near-constant in sub-Saharan Africa.[1,2] According to the World Health  
8 Organization (WHO), most maternal deaths could be prevented with ready access to adequate  
9 obstetric services.[3,4] Millennium Development Goal 5 calls for a three-quarters reduction in  
10 MMR globally by 2015. Strides have been made toward this target; however, large-scale  
11 international programs have not reduced maternal mortality significantly in areas of the world  
12 that bear the greatest burden.[1,5,6]

13  
14  
15 Programs to reduce maternal mortality must consider the local context of maternal mortality  
16 and access to maternal health services if they are to be effective.[6-8] Recent efforts to improve  
17 the measurement of maternal mortality globally have yielded more accurate and complete  
18 data.[1] Still, there is a paucity of primary community information in many countries with the  
19 highest MMR, such as Liberia.[1,9-11] In addition, a high degree of variability in MMR and access  
20 to maternal care exists within communities.[12,13]

21  
22  
23 In areas with high maternal mortality and poor information systems, process indicators can be  
24 highly informative to evaluate the unmet need for maternal health care. Direct measurement of  
25 service delivery includes the proportion of women who deliver in a health facility under skilled  
26 attendance and the rate of cesarean delivery.[14-16] These indicators are easier to capture than  
27 MMR partly because maternal death is difficult to ascertain, especially in rural areas, or may  
28 occur in small catchment areas with low numbers over a short evaluation timespan.[17]

1  
2  
3 Liberia was the setting for our study and is among the poorest countries in the world; it has one  
4  
5 of the ten highest national MMR of any nation.[18] Hogan and colleagues estimated MMR in  
6  
7 Liberia to be 859 (uncertainty interval, 547-1287) maternal deaths per 100,000 live births in  
8  
9 2008.[1] By comparison, the MMR in Ghana, among the lowest in the region, was 409 (248-633),  
10  
11 and in neighbor Sierra Leone, it was 1033 (635-1627), the region's highest. The wide uncertainty  
12  
13 intervals are reflective of the relative lack of data captured by poor health information systems  
14  
15 in Liberia, which is still recovering from a 14-year civil war that ended in 2003. Health  
16  
17 infrastructure and human resources were decimated during that span. In 2009, the country was  
18  
19 estimated to have a deficit of 10,000 health care workers.[19] The 2009 World Health Statistics  
20  
21 report confirms a corresponding gap in access to essential services, citing only 46% of women in  
22  
23 Liberia deliver under skilled attendance in health facilities.[20] In addition, the national  
24  
25 cesarean delivery rate in 2007 was 3.5%, and <1.0% in rural parts of the country.[12,20] As  
26  
27 Liberia rebuilds its health infrastructure and targets maternal mortality, community-level  
28  
29 research is needed to appropriately direct maternal health interventions.[21]  
30  
31  
32  
33  
34  
35

36 The objective of this study was to characterize utilization of maternal health services, including  
37  
38 facility delivery and cesarean delivery, in rural north-central Liberia and describe the motives of  
39  
40 women seeking or not seeking facility-based care.  
41  
42  
43

## 44 **METHODS**

45  
46  
47 We conducted a cross-sectional study employing a structured interview in a community setting,  
48  
49 as well as a review of medical records at the local hospital. The individual structured interview  
50  
51 comprised of questions on the behavior and attitudes of women regarding maternal health care.  
52  
53

54 Eight communities were chosen based on the presence of existing outreach programs for a  
55  
56 regional hospital in Nimba County, located in north-central Liberia. All communities were within  
57  
58  
59  
60

1  
2  
3 15 km of the hospital. More than 95% of the county's 462,000 residents live in a rural  
4  
5 setting.[12]  
6  
7

8 All women between the ages of 15-49 years were eligible, consonant with age sampling of the  
9  
10 2007 Liberia Demographic and Health Survey.[12] Women were approached for participation in  
11  
12 their homes. All households in each village were visited once, resulting in a convenience sample  
13  
14 given absenteeism. Community health workers were trained to conduct 25-minute standardized  
15  
16 interviews. Questions in English were designed in collaboration with clinicians, public health  
17  
18 technicians, and community health workers in Liberia. Interviews were conducted orally in  
19  
20 English or Mano, a language spoken in the region, as per a participant's preference. The  
21  
22 interviewers were trained to record responses including multiple answers given to open-ended  
23  
24 questions. Responses were coded by a member of the research team. Verbal informed consent  
25  
26 was obtained from all participants. Women received a small non-monetary compensation  
27  
28 (value=US\$2) for their time.  
29  
30  
31  
32  
33

34  
35 The review of medical records involved a retrospective evaluation of all deliveries at a regional  
36  
37 hospital in Nimba County using general medical and operating room records. Data were  
38  
39 extracted on method of delivery, incidence of stillbirth, and maternal and fetal indications for  
40  
41 cesarean delivery. Extraction was performed by a hospital data officer and a medical student.  
42  
43  
44

#### 45 **Statistical analysis**

46  
47 Participant responses were analyzed for frequencies, means, and standard deviations as  
48  
49 indicated. Participant characteristics were correlated with their interview responses. Nulliparous  
50  
51 women were excluded from analysis of questions related to prior pregnancies. Fisher's exact  
52  
53 test was used to evaluate categorical variables and Student's T-test was used for continuous  
54  
55  
56  
57  
58  
59  
60

1  
2  
3 variables. Our primary outcomes of interest were facility delivery rate assessed in the  
4  
5 community and Cesarean delivery rate in a regional hospital.  
6  
7

8  
9 Data were kept anonymous at all times by removing all identifiers. Ethical approval was granted  
10  
11 by the Vanderbilt University Institutional Review Board, and the Medical Director of the Liberian  
12  
13 hospital.  
14

## 15 16 17 **RESULTS**

18  
19 Between May 2009 and August 2009, 316 women were approached to participate in community  
20  
21 interviews. Of these 307 (97.2%) met eligibility criteria, consented, and completed the interview.  
22  
23 Participants had a mean age of 30.5 (SD±7.5)(Table 1). The median parity was 4.8 (SD±3.0).  
24  
25

26  
27 More than half (n=174, 57.1%) of women reported having no formal education. Of 280 women  
28  
29 who reported previous parity, 210 (75.0%) reported delivering their previous child at home with  
30  
31 a traditional birth attendant (TBA) and 23 (8.2%) at home without a TBA. Interviewers then  
32  
33 asked, "Why did you choose to deliver your child in this place?" Responses for those delivering  
34  
35 at home included, 'cost' or 'difficulty with transport' (31.5%), 'quick onset of labor' (30.6%),  
36  
37 'family tradition' or 'religion' (16.9%), 'TBA is safe' (16.9%), and 'conflict' or 'flooding' (3.7%).  
38  
39

40  
41 Women who reported delivering in a hospital responded, 'labor complications at home' (57.8%),  
42  
43 'hospital nearby' (13.3%), 'antenatal referral' (11.1%) 'safety' (11.1%), and 'previous cesarean  
44  
45 delivery' (6.7%).  
46  
47

48  
49 In women who reported delivering at home, and those who reported delivering in a hospital,  
50  
51 there was no statistical evidence to suggest a difference in age, parity, relationship status, or  
52  
53 whether a woman reporting losing a child during a previous pregnancy (Table 2). Women who  
54  
55 reported delivering at home were less likely to have education at or beyond the primary level, a  
56  
57 result that had borderline statistical significance (p=0.057).  
58  
59  
60

1  
2  
3 In a 1-year period between April 2008-March 2009, 949 live births occurred in the study  
4 hospital. In the same period, 82 stillbirths were recorded, 8.0% of total births (n=1031). The rate  
5 of cesarean delivery at the hospital was 35.5% (n=337). The stillbirth rate in the cesarean subset  
6 was 12.4%. Common indications for cesarean delivery included cephalopelvic disproportion  
7 (50.0%), previous cesarean delivery (12.7%), antepartum hemorrhage due to placenta previa or  
8 placental abruption (10.2%), eclampsia (8.5%), breech presentation (5.0%), and ruptured uterus  
9 (4.2%).  
10  
11  
12  
13  
14  
15  
16  
17  
18  
19

## 20 DISCUSSION

21  
22  
23 In structured interviews conducted in villages proximate to a hospital in Nimba County, Liberia,  
24 only one in six women reported delivering their last child in a hospital, i.e., 83.2% of women  
25 reported their last delivery to have been at home. Of women delivering at a regional hospital,  
26 35.5% were by cesarean section and 8.0% were stillborn. These metrics indicate severe  
27 underutilization of timely, supervised, institutional birthing services among women in north-  
28 central Liberia. Participants reported financial and transportation barriers to seeking care, as  
29 well as cultural traditions including the practice of delivery under the care of TBA. Further, more  
30 than half of women who delivered their last child in a hospital did so only after experiencing  
31 complications in labor at home. This was validated by the hospital's high cesarean section rate.  
32 These findings are similar to those of a 2011 study in the same region of Liberia that highlighted  
33 the impact of geographic and financial barriers, perceptions of quality in the formal and informal  
34 health care systems, and prevailing care by TBAs on the health care utilization.[22]  
35  
36  
37  
38  
39  
40  
41  
42  
43  
44  
45  
46  
47  
48  
49  
50

51  
52 The rates of hospital delivery in our study were significantly lower than the national (46.3%) and  
53 county (32.6%) statistics reported in 2007 for skilled attendance at delivery, a related metric  
54 used by the WHO and Liberia Ministry of Health to assess women's access to safe maternal  
55  
56  
57  
58  
59  
60

1  
2  
3 health services.[3,12] Skilled attendance differs from facility delivery in the requirement of  
4 supervision of childbirth by a physician, nurse, trained midwife or physician's assistant.[10] This  
5 is deemed vital to the early recognition of life-threatening intrapartum complications, and their  
6 effective management.[4,14] While hospital delivery is a prerequisite for skilled attendance in  
7 Liberia where home deliveries are rarely supervised by a professional in the above cadres, it is  
8 not necessarily true that all hospital deliveries have the appropriate personnel present.  
9  
10 Therefore, our measured rates of facility delivery potentially overestimate the true figure for  
11 safe delivery under skilled attendance among the participants.  
12  
13  
14  
15  
16  
17  
18  
19  
20  
21

22 The definition for skilled attendants notably excludes TBAs because they do not have access to  
23 resources for medical or surgical management of labor.[3] Women under TBA care who have  
24 conditions such as dystocia, eclampsia, or bleeding are exceedingly vulnerable. In addition, TBAs  
25 have limited training in the recognition of complications, and in the study community there  
26 were no formal mechanisms for timely referral if complications arose.[9] Actually, only 16.9%  
27 believed that a delivery with a TBA was safe, a finding similar to a previous study in east  
28 Africa.[23]  
29  
30  
31  
32  
33  
34  
35  
36  
37  
38

39 When we compared women who delivered their last child at home to those who delivered in a  
40 hospital, only education differed; home-delivered women were more likely to report having no  
41 formal education. Previous studies have demonstrated the alarming inequalities in access to  
42 maternal health care based on education levels, as well as wealth, rurality, and religion.[6,13,24]  
43  
44  
45  
46  
47  
48

49 In our review of hospital medical and operating room records we found that cesarean delivery  
50 accounted for more than a third of all deliveries, though there were relatively few births at the  
51 facility in the study period. The hospital serves a region of approximately 250,000 people where  
52 nearly 10,000 births were expected annually.[12] While smaller health facilities may provide  
53  
54  
55  
56  
57  
58  
59  
60



1  
2  
3 services in a portion of these births, the delivery number at the study site is still very low and  
4  
5 reflects the trend toward home delivery found in interviews.  
6  
7

8  
9 In addition, the high rate of cesarean delivery may stem from referral of complicated cases from  
10  
11 other facilities and late presentation after attempted home delivery.[25,26] Prolonged labor,  
12  
13 antepartum hemorrhage, and ruptured uterus were the common antecedents to cesarean  
14  
15 delivery.[27] Unfortunately, we were not able to ascertain the duration of labor, location where  
16  
17 labor was initiated, and delays in accessing care. Prior research in the region using the “three-  
18  
19 delays” model found significant delays at all three stages — deciding to seek care, reaching a  
20  
21 health facility, and receiving needed care at the facility.[9,25] These prior studies similarly  
22  
23 highlighted the importance of family and TBA influence on timely access to care.  
24  
25  
26

27  
28 Cesarean delivery is cited as a life-saving component of Comprehensive Emergency Obstetric  
29  
30 Care (EmOC).[16] Criteria for Comprehensive EmOC include 24-hour cesarean delivery and blood  
31  
32 transfusion availability, standards not met by this regional hospital.[28] Obstacles to the delivery  
33  
34 of Comprehensive EmOC included human resource shortages, intermittent electricity supplied  
35  
36 exclusively by generator, and scarcity of donated blood that often necessitated donations from  
37  
38 the patient’s family at the time of the operation.  
39  
40  
41

42  
43 Limitations of our study included non-randomized sampling of participants in community  
44  
45 interviews. In fact, convenience recruitment in proximate communities with active hospital  
46  
47 outreach programs may have over-represented “health-seekers” and women with access to  
48  
49 hospital services, or skewed the sample population in unknown ways by excluding women who  
50  
51 were not at home when interviewers visited. Additionally, the hospital-based portion of our  
52  
53 study was limited by poor data quality, particularly pertaining to “history of the present illness,”  
54  
55  
56  
57  
58  
59  
60

1  
2  
3 a key timeline necessary to evaluate the dynamic causes of birth complications in the context of  
4  
5 home- and facility-delivery.  
6  
7

8  
9 The combination of community and facility data enabled us to report on deficiencies in the  
10  
11 utilization of maternal health services in north-central Liberia. Many women in need of such  
12  
13 services did not access them, even if care was available locally. Additionally, there was a high  
14  
15 rate of serious complications among women presenting to the hospital for cesarean delivery.  
16  
17 Greater outreach and referral services as well as education among women and traditional birth  
18  
19 attendants are needed to improve timely utilization of care. Our study also highlights the  
20  
21 importance of performing local assessments of maternal health services to inform policy and  
22  
23 programmatic interventions at the community level.  
24  
25  
26  
27  
28  
29  
30  
31  
32  
33  
34  
35  
36  
37  
38  
39  
40  
41  
42  
43  
44  
45  
46  
47  
48  
49  
50  
51  
52  
53  
54  
55  
56  
57  
58  
59  
60

**Table 1.** Interview responses of women (n=307)\* interviewed in their homes in rural northern Liberia in 2010

| Characteristic                                                             | Value      |
|----------------------------------------------------------------------------|------------|
| <b>Age, mean years (SD)</b>                                                | 30.5 (7.5) |
| <b>Parity, mean no. (SD)</b>                                               | 4.8 (3.0)  |
| <b>Education level, no. (%)</b>                                            |            |
| No formal education                                                        | 174 (57.1) |
| Some primary                                                               | 114 (37.4) |
| Completed primary or greater                                               | 17 (5.6)   |
| <b>Relationship status, no. (%)</b>                                        |            |
| Married                                                                    | 223 (72.6) |
| Unmarried                                                                  | 84 (27.4)  |
| <b>Lost a child during pregnancy, no. (%)</b>                              |            |
| Yes                                                                        | 113 (37.0) |
| No                                                                         | 192 (63.0) |
| <b>Last child delivered, no. (%)<sup>†</sup></b>                           |            |
| In hospital                                                                | 47 (16.8)  |
| At home with traditional midwife (TM)                                      | 210 (75.0) |
| At home without TM                                                         | 23 (8.2)   |
| <b>Why did you choose to deliver your child in this place?<sup>†</sup></b> |            |
| <b>Home, no. (%)</b>                                                       |            |
| 'Cost' or 'Difficulty with transport'                                      | 69 (31.5)  |
| 'Quick onset of labor'                                                     | 67 (30.6)  |

|  |                                  |           |
|--|----------------------------------|-----------|
|  | 'Family tradition' or 'Religion' | 37 (16.9) |
|  | 'TM is safe'                     | 37 (16.9) |
|  | 'Conflict' or 'Flooding'         | 8 (3.7)   |
|  | <b>Hospital, no. (%)</b>         |           |
|  | 'Labor complications at home'    | 26 (57.8) |
|  | 'Hospital nearby'                | 6 (13.3)  |
|  | 'Antenatal referral'             | 5 (11.1)  |
|  | 'Hospital is safer'              | 5 (11.1)  |
|  | 'Previous Cesarean delivery'     | 3 (6.7)   |

\* Totals may not add to 307 due to missing values.

† N=280 excluding nulliparous women

**Table 2.** Comparison of characteristics of rural Liberian women who reported delivering their last child at home or in hospital, excluding nulliparous women (n=280)

| Characteristic                                              | HOME       | HOSPITAL   | P-value |
|-------------------------------------------------------------|------------|------------|---------|
| <b>Age, mean years (SD)</b>                                 | 30.9 (7.3) | 29.6 (8.3) | 0.29    |
| <b>Parity, mean no. (SD)</b>                                | 4.9 (2.9)  | 4.5 (3.2)  | 0.32    |
| <b>Education level, no. (%)</b>                             |            |            |         |
| None                                                        | 139 (59.9) | 20 (43.5)  | 0.057   |
| Some primary                                                | 84 (36.2)  | 22 (47.8)  |         |
| Completed primary or greater                                | 9 (3.9)    | 4 (8.7)    |         |
| <b>Relationship status, no. (%)</b>                         |            |            |         |
| Married                                                     | 168 (72.1) | 33 (70.2)  | 0.86    |
| Unmarried                                                   | 65 (27.9)  | 14 (29.8)  |         |
| <b>Lost a child during pregnancy or childbirth, no. (%)</b> |            |            |         |
| Yes                                                         | 86 (36.9)  | 18 (38.3)  | 0.87    |
| No                                                          | 147 (63.1) | 29 (61.7)  |         |

## References

- 1 Hogan MC, Foreman KJ, Naghavi M, *et al.* Maternal mortality for 181 countries, 1980-2008: a systematic analysis of progress towards Millennium Development Goal 5. *Lancet* 2010;**375**:1609–23.
- 2 Hill K, Thomas K, AbouZahr C, *et al.* Estimates of maternal mortality worldwide between 1990 and 2005: an assessment of available data. *Lancet* 2007;**370**:1311–9.

- 1
- 2
- 3 Farooqi S. The World Health Report 2005: Make Every Mother and Child Count. *World Health Organization* 2005.
- 4
- 5
- 6
- 7 4 Campbell OMR, Graham WJ, Lancet Maternal Survival Series steering group. Strategies for reducing maternal mortality: getting on with what works. *Lancet* 2006;**368**:1284–99.
- 8
- 9
- 10 5 *The Millennium Development Goals Report*. New York, 2006: : United Nations Department of Economic and Social Affairs 2006.
- 11
- 12
- 13 6 Freedman LP, Graham WJ, Brazier E, *et al*. Practical lessons from global safe motherhood initiatives: time for a new focus on implementation. *Lancet* 2007;**370**:1383–91.
- 14
- 15
- 16
- 17 7 Friberg IK, Kinney MV, Lawn JE, *et al*. Sub-Saharan Africa's Mothers, Newborns, and Children: How Many Lives Could Be Saved with Targeted Health Interventions? *PLoS Med* 2010;**7**:e1000295.
- 18
- 19
- 20
- 21 8 Kinney MV, Kerber KJ, Black RE, *et al*. Sub-Saharan Africa's Mothers, Newborns, and Children: Where and Why Do They Die? *PLoS Med* 2010;**7**:e1000294.
- 22
- 23
- 24 9 Lori JR, Starke AE. A critical analysis of maternal morbidity and mortality in Liberia, West Africa. *Midwifery* 2012;**28**:67–72.
- 25
- 26
- 27
- 28 10 AbouZahr C. New estimates of maternal mortality and how to interpret them: choice or confusion? *Reprod Health Matters* 2011;**19**:117–28.
- 29
- 30
- 31 11 WHO, UNFPA, UNICEF, *et al*. *UNFPA, The World Bank: Trends in Maternal Mortality: 1990 to 2008*. Geneva: : World Health Organization 2010.
- 32
- 33
- 34 12 Liberia: Demographic and Health Survey 2007. *Ministry of Health and Social Welfare* 2007.
- 35
- 36 13 Wylie BJ, Mirza FG. Cesarean delivery in the developing world. *Clin Perinatol* 2008;**35**:571–82, xii.
- 37
- 38
- 39 14 Urassa D, Carlstedt A, Nyström L. Are Process Indicators Adequate to Assess Essential Obstetric Care at District Level? — A Case Study from Rufiji District, Tanzania. *African Journal of Reproductive Health* 2005;**9**:100–11.
- 40
- 41 15 Hatt L, Stanton C, Makowiecka K. Did the strategy of skilled attendance at birth reach the poor in Indonesia? *Bull World Health Organ* 2007;**85**:774–82.
- 42
- 43 16 Shah A, Fawole B, M'Imunya JM, *et al*. Cesarean delivery outcomes from the WHO global survey on maternal and perinatal health in Africa. *Int J Gynecol Obstet* 2009;**107**:191–7.
- 44
- 45 17 Kidney E, Winter H, Khan K. Systematic review of effect of community-level interventions to reduce maternal mortality. *BMC Pregnancy Childbirth* 2009;**9**.
- 46
- 47 18 *Human Development Report:2010*. New York: : United Nation Development Programme 2010.
- 48
- 49
- 50
- 51
- 52
- 53
- 54
- 55
- 56
- 57
- 58
- 59
- 60

- 1  
2  
3  
4  
5  
6  
7  
8  
9  
10  
11  
12  
13  
14  
15  
16  
17  
18  
19  
20  
21  
22  
23  
24  
25  
26  
27  
28  
29  
30  
31  
32  
33  
34  
35  
36  
37  
38  
39  
40  
41  
42  
43  
44  
45  
46  
47  
48  
49  
50  
51  
52  
53  
54  
55  
56  
57  
58  
59  
60
- 19 Cheng MH. Reviving health care in Liberia. *Lancet* 2009;**373**:1239–40.
- 20 *World health statistics: 2009*. Geneva: : World Health Organization 2009.
- 21 Kruk ME, Rockers PC, Williams EH, *et al*. Availability of essential health services in post-conflict Liberia. *Bull World Health Organ* 2010;**88**:527–34.
- 22 Kruk ME, Rockers PC, Varpilah ST, *et al*. Which doctor?: Determinants of utilization of formal and informal health care in postconflict liberia. *Med Care* 2011;**49**:585–91.
- 23 Kruk ME, Rockers PC, Mbaruku G, *et al*. Community and health system factors associated with facility delivery in rural Tanzania: a multilevel analysis. *Health policy* 2010;**97**:209–16.
- 24 Stanton C, Holtz S. Levels and trends in cesarean birth in the developing world. *Studies in Family Planning* 2011;**37**:41–8.
- 25 Thaddeus S, Maine D. Too far to walk: maternal mortality in context. *Soc Sci Med* 1994;**38**:1091–110.
- 26 Mbaruku G, van Roosmalen J, Kimondo I, *et al*. Perinatal audit using the 3-delays model in western Tanzania. *International Journal of Gynecology and Obstetrics* 2009;**106**:85–8.
- 27 Stanton C, Ronsmans C, Baltimore Group on Cesarean. Recommendations for routine reporting on indications for cesarean delivery in developing countries. *Birth* 2008;**35**:204–11.
- 28 Bailey P, Paxton A, Lobis S, *et al*. The availability of life-saving obstetric services in developing countries: An in-depth look at the signal functions for emergency obstetric care. *Int J Gynecol Obstet* 2006;**93**:285–91.

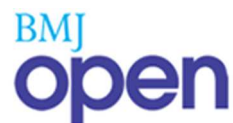

**Access to facility delivery and caesarean section in north-central Liberia: a cross-sectional community-based study**

|                                 |                                                                                                                                                                                                                                                                                                                                                                                                       |
|---------------------------------|-------------------------------------------------------------------------------------------------------------------------------------------------------------------------------------------------------------------------------------------------------------------------------------------------------------------------------------------------------------------------------------------------------|
| Journal:                        | <i>BMJ Open</i>                                                                                                                                                                                                                                                                                                                                                                                       |
| Manuscript ID:                  | bmjopen-2012-001602.R1                                                                                                                                                                                                                                                                                                                                                                                |
| Article Type:                   | Research                                                                                                                                                                                                                                                                                                                                                                                              |
| Date Submitted by the Author:   | 27-Aug-2012                                                                                                                                                                                                                                                                                                                                                                                           |
| Complete List of Authors:       | Gartland, Matthew; Vanderbilt University School of Medicine, Vanderbilt Institute for Global Health<br>Taryor, Victor; Ganta United Methodist Hospital, Ganta, Liberia,<br>Norman, Andy; Vanderbilt University School of Medicine, Obstetrics and Gynecology<br>Vermund, Sten; Vanderbilt University School of Medicine, Pediatrics;<br>Vanderbilt University, Vanderbilt Institute for Global Health |
| <b>Primary Subject Heading</b>: | Global health                                                                                                                                                                                                                                                                                                                                                                                         |
| Secondary Subject Heading:      | Obstetrics and gynaecology, Public health, Reproductive medicine                                                                                                                                                                                                                                                                                                                                      |
| Keywords:                       | Liberia, Maternal health, Health care utilization, Emergency obstetric care                                                                                                                                                                                                                                                                                                                           |
|                                 |                                                                                                                                                                                                                                                                                                                                                                                                       |

SCHOLARONE™  
Manuscripts



**Abstract:**

**Objective:** Rural north-central Liberia has one of the world's highest maternal mortality ratios. We studied health facility birthing service utilization and the motives of women seeking or not seeking facility-based care in north-central Liberia.

**Design:** Cross-sectional community-based structured interviews and health facility medical record review.

**Setting:** A regional hospital and the surrounding communities in rural north-central Liberia.

**Participants:** A convenience sample of 307 women between 15-49 years participated in structured interviews. 1031 deliveries performed in the regional hospital were included in the record review.

**Primary outcomes:** Delivery within a health facility and cesarean delivery rates were used as indicators of direct utilization of care and as markers of availability of maternal health services.

**Results:** Of 280 interview respondents with a prior childbirth, only 47 (16.8%) delivered their last child in a health facility. Women who did not use formal services cited cost, sudden labor, and family tradition or religion as their principal reasons for home delivery. At the regional hospital, the cesarean delivery rate was 35.5%.

**Conclusions:** There is an enormous unmet need for maternal health services in north-central Liberia. Greater outreach and referral services as well as community-based education among women, family members, and traditional midwives are vital to improve the timely utilization of care.

## INTRODUCTION

In 2008 an estimated 342,900 women died in childbirth worldwide.[1] A vast global disparity exists, with more than 99% of maternal deaths taking place in low and middle-income countries (LMIC). The maternal mortality ratio (MMR) represents the number of maternal deaths per 100,000 live births. MMR has decreased in Asia and Latin America in the past two decades, but has remained near-constant in sub-Saharan Africa.[1-3] According to the World Health Organization (WHO), most maternal deaths could be prevented with ready access to adequate obstetric services.[4,5] Millennium Development Goal 5 calls for a three-quarters reduction in MMR globally by 2015. Strides have been made toward this target; however, large-scale international programs have not reduced maternal mortality significantly in areas of the world that bear the greatest burden.[1,6,7]

Programs to reduce maternal mortality must consider the local context of maternal mortality and access to maternal health services if they are to be effective.[7-9] Recent efforts to improve the measurement of maternal mortality globally have yielded more accurate and complete data.[1] Still, there is a paucity of primary community information in many countries with the highest MMR, such as Liberia.[1,3,10,11] In addition, a high degree of variability in MMR and access to maternal care exists within communities.[12,13]

In areas with high maternal mortality and poor information systems where data on maternal mortality are not available, process indicators related to this outcome can be highly informative to evaluate the unmet need for maternal health care. Process indicators for maternal mortality include the proportion of women who deliver in a health facility under skilled attendance and the rate of cesarean delivery.[14-16] These indicators are easier to capture partly because

1  
2  
3 maternal death is difficult to ascertain, especially in rural areas, or may occur in small catchment  
4  
5 areas with low numbers over a short evaluation timespan.[17]  
6  
7

8  
9 Liberia is among the poorest countries in the world; it has one of the ten highest national MMR  
10  
11 of any nation.[18] Hogan and colleagues estimated MMR in Liberia to be 859 (uncertainty  
12  
13 interval, 547-1287) maternal deaths per 100,000 live births in 2008.[1] By comparison, the MMR  
14  
15 in Ghana, among the lowest in the region, was 409 (248-633), and in neighbor Sierra Leone, it  
16  
17 was 1033 (635-1627), the region's highest. The wide uncertainty intervals are reflective of the  
18  
19 relative lack of data captured by poor health information systems in Liberia, which is still  
20  
21 recovering from a 14-year civil war that ended in 2003. Health infrastructure and human  
22  
23 resources were decimated during that span. In 2009, the country was estimated to have a deficit  
24  
25 of 10,000 health care workers.[19] The 2007 Liberia Demographic and Health Survey confirms a  
26  
27 corresponding gap in access to essential services, citing only 46% of women in Liberia deliver  
28  
29 under skilled attendance in health facilities.[12] In addition, the national cesarean delivery rate  
30  
31 in 2007 was 3.5%, and <1.0% in rural parts of the country.[12,20] As Liberia rebuilds its health  
32  
33 infrastructure and targets maternal mortality, community-level research is needed to  
34  
35 appropriately direct maternal health interventions.  
36  
37  
38  
39

40  
41 The objective of this study was to characterize utilization of maternal health services, including  
42  
43 facility delivery and cesarean delivery, in rural north-central Liberia and describe the motives of  
44  
45 women seeking or not seeking facility-based care.  
46  
47  
48

## 49 **METHODS**

50  
51  
52 We conducted a cross-sectional study employing a structured interview in a community setting,  
53  
54 as well as a review of medical records at the local hospital. The individual structured interview  
55  
56 comprised of questions on the behavior and attitudes of women regarding maternal health care.  
57  
58  
59  
60

1  
2  
3 Eight communities were chosen based on the presence of existing outreach programs for  
4 antenatal education and childhood immunizations for a regional hospital in Nimba County,  
5 located in north-central Liberia. All communities were within 15 km of the hospital. More than  
6  
7  
8  
9  
10 95% of the county's 462,000 residents live in a rural setting.[12]  
11

12  
13 All women between the ages of 15-49 years were eligible, consonant with age sampling of the  
14 2007 Liberia Demographic and Health Survey.[12] Women were approached for participation in  
15 their homes or in other public spaces such as community meeting places. All households and  
16 public locations in each village were visited once, resulting in a convenience sample given  
17 absenteeism. Community health workers were trained to conduct 25-minute standardized  
18 interviews. Questions in English were designed in collaboration with clinicians, public health  
19 technicians, and community health workers in Liberia. Interviews were conducted orally in  
20 English or Mano, a language spoken in the region, as per a participant's preference. The  
21 interviewers were trained to record responses including multiple answers given to open-ended  
22 questions. Responses were coded by a member of the research team. Verbal informed consent  
23 was obtained from all participants. Women received a small non-monetary compensation  
24 (value≈US\$2) for their time.  
25  
26  
27  
28  
29  
30  
31  
32  
33  
34  
35  
36  
37  
38  
39  
40  
41

42 The review of medical records involved a retrospective evaluation of all deliveries at a regional  
43 hospital in Nimba County using general medical and operating room records. Data were  
44 extracted on method of delivery, incidence of stillbirth, and maternal and fetal indications for  
45 cesarean delivery. Extraction was performed by a hospital data officer and a medical student.  
46  
47  
48  
49  
50

### 51 **Statistical analysis**

52  
53  
54  
55 Participant responses were analyzed for frequencies, means, and standard deviations as  
56 indicated. Participant characteristics were correlated with their interview responses. Nulliparous  
57  
58  
59  
60

1  
2  
3 women were excluded from analysis of questions related to prior deliveries. Respondents with  
4  
5 missing data were dropped from all analyses. Fisher's exact test was used to evaluate  
6  
7  
8 categorical variables and Student's T-test was used for continuous variables. All analyses were  
9  
10 performed with SAS version 9.1.3 (SAS Institute, Cary, NC). Our primary outcomes of interest  
11  
12 were facility delivery rate assessed in the community and cesarean delivery rate in a regional  
13  
14 hospital.

15  
16  
17  
18 Data were kept anonymous at all times by removing all identifiers. Ethical approval was granted  
19  
20 by the Vanderbilt University Institutional Review Board, and the Medical Director of the Liberian  
21  
22 hospital.  
23

## 24 25 26 **RESULTS**

27  
28  
29 Between May 2009 and August 2009, 316 women were approached to participate in community  
30  
31 interviews. Of these 307 (97.2%) met eligibility criteria, consented, and completed the interview.  
32  
33 There was 1 (0.3%) documented refusal. Participants had a mean age of 30.5 (SD±7.5)(Table 1).  
34  
35 The mean parity was 4.8 (SD±3.0). More than half (n=174, 57.1%) of women reported having no  
36  
37 formal education. There were 6 (2.0%) nulliparous women and 21 (6.8%) who chose not to  
38  
39 answer questions regarding the site of delivery in the immediate prior pregnancy. Of the  
40  
41 remaining 280 women, 210 (75.0%) reported delivering their previous child at home with a  
42  
43 traditional midwife (TM) and 23 (8.2%) at home without a TM. Interviewers then asked the  
44  
45 open-ended question, "Why did you choose to deliver your child in this place?" for which  
46  
47 multiple responses were accepted. Responses for those delivering at home included, 'cost' or  
48  
49 'difficulty with transport' (31.5%), 'quick onset of labor' (30.6%), 'family tradition' or 'religion'  
50  
51 (16.9%), 'TM is safe' (16.9%), and 'conflict' or 'flooding' (3.7%). Women who reported delivering  
52  
53  
54  
55  
56  
57  
58  
59  
60

1  
2  
3 in a hospital responded, 'labor complications at home' (57.8%), 'hospital nearby' (13.3%),  
4  
5 'antenatal referral' (11.1%) 'safety' (11.1%), and 'previous cesarean delivery' (6.7%).  
6  
7

8  
9 In women who reported delivering at home, and those who reported delivering in a hospital,  
10  
11 there was no statistical evidence to suggest a difference in age, parity, relationship status, or  
12  
13 whether a woman reporting losing a child during a prior pregnancy (Table 2). Women who  
14  
15 reported delivering at home were less likely to have education at or beyond the primary level, a  
16  
17 result that had borderline statistical significance ( $p=0.057$ ).  
18  
19

20  
21 In a 1-year period between April 2008-March 2009, 949 live births occurred in the study  
22  
23 hospital. In the same period, 82 stillbirths were recorded, 8.0% of total births ( $n=1031$ ). The rate  
24  
25 of cesarean delivery at the hospital was 35.5% ( $n=337$ ). The stillbirth rate in the cesarean subset  
26  
27 was 12.4%. Common indications for cesarean delivery included cephalopelvic disproportion  
28  
29 (50.0%), previous cesarean delivery (12.7%), antepartum hemorrhage due to placenta previa or  
30  
31 placental abruption (10.2%), eclampsia (8.5%), breech presentation (5.0%), and ruptured uterus  
32  
33 (4.2%).  
34  
35  
36  
37

## 38 **DISCUSSION**

39  
40  
41 In structured interviews conducted in villages proximate to a hospital in Nimba County, Liberia,  
42  
43 only one in six women reported delivering their last child in a hospital, i.e., 83.2% of women  
44  
45 reported their last delivery to have been at home. Of women delivering at a regional hospital,  
46  
47 35.5% were by cesarean section and 8.0% were stillborn. These metrics indicate severe  
48  
49 underutilization of timely, supervised, institutional birthing services among women in north-  
50  
51 central Liberia. Participants reported financial and transportation barriers to seeking care, as  
52  
53 well as cultural traditions including the practice of delivery under the care of a TM. (Traditional  
54  
55 midwife is the term used in Liberia, analogous to the traditional birth attendant in other  
56  
57  
58  
59  
60

1  
2  
3 nations.) Further, more than half of women who delivered their last child in a hospital did so  
4  
5 only after experiencing complications in labor at home. This was validated by the hospital's high  
6  
7 cesarean section rate. These findings of underutilization of the formal health sector are similar  
8  
9 to those of a 2011 study in the same region of Liberia that highlighted the impact of geographic  
10  
11 and financial barriers, perceptions of quality in the formal and informal health care systems, and  
12  
13 prevailing care by informal health workers, including TM, on the health care utilization.[21]  
14  
15

16  
17  
18 The rates of hospital delivery in our study were significantly lower than the national (46.3%) and  
19  
20 county (32.6%) statistics reported in 2007 for skilled attendance at delivery, a related metric  
21  
22 used by the WHO and Liberia Ministry of Health to assess women's access to safe maternal  
23  
24 health services.[4,12] Skilled attendance differs from facility delivery in the requirement of  
25  
26 supervision of childbirth by a physician, nurse, trained midwife or physician's assistant.[11] This  
27  
28 is deemed vital to the early recognition of life-threatening intrapartum complications, and their  
29  
30 effective management.[5,14] While hospital delivery is a prerequisite for skilled attendance in  
31  
32 Liberia where home deliveries are rarely supervised by a professional in the above cadres, it is  
33  
34 not necessarily true that all hospital deliveries have the appropriate personnel present.  
35  
36 Therefore, our measured rates of facility delivery potentially overestimate the true figure for  
37  
38 safe delivery under skilled attendance among the participants.  
39  
40  
41  
42

43  
44 The definition for skilled attendants notably excludes TM because they do not have access to  
45  
46 resources for medical or surgical management of labor.[4] Women under TM care who have  
47  
48 conditions such as dystocia, eclampsia, or bleeding are exceedingly vulnerable. In addition, TM  
49  
50 have limited training in the recognition of complications, and in the study community there  
51  
52 were no formal mechanisms for timely referral if complications arose.[10]  
53  
54  
55  
56  
57  
58  
59  
60

1  
2  
3 When we compared women who delivered their last child at home to those who delivered in a  
4 hospital, only education differed; home-delivered women were more likely to report having no  
5 formal education. Previous studies have demonstrated the alarming inequalities in access to  
6 maternal health care based on education levels, as well as wealth, rural venue, and  
7 religion.[7,13,22]  
8  
9

10  
11  
12 In our review of hospital medical and operating room records we found that cesarean delivery  
13 accounted for more than a third of all deliveries, though there were relatively few births at the  
14 facility in the study period. The hospital serves a region of approximately 250,000 people where  
15 nearly 10,000 births were expected annually.[12] Additionally it is the only facility within a 35km  
16 radius with capacity to provide cesarean delivery service. While smaller health facilities in the  
17 region equipped to offer assisted vaginal delivery may provide services in a portion of births in  
18 the catchment area, the delivery number at the study site is still very low and reflects the trend  
19 toward home delivery found in interviews.  
20  
21  
22  
23  
24  
25  
26  
27  
28  
29  
30  
31  
32  
33

34  
35 In addition, the high rate of cesarean delivery may stem from referral of complicated cases from  
36 other facilities and late presentation after attempted home delivery.[23,24] Prolonged labor,  
37 antepartum hemorrhage, and ruptured uterus were the common antecedents to cesarean  
38 delivery.[25] Unfortunately, we were not able to ascertain the duration of labor, location where  
39 labor was initiated, and delays in accessing care. Prior research in the region using the “three-  
40 delays” model found significant delays at all three stages — deciding to seek care, reaching a  
41 health facility, and receiving needed care at the facility.[10,23] These prior studies similarly  
42 highlighted the importance of family and TM influence on timely access to care.  
43  
44  
45  
46  
47  
48  
49  
50  
51  
52

53  
54 Cesarean delivery is cited as a life-saving component of Comprehensive Emergency Obstetric  
55 Care (EmOC).[16] Criteria for Comprehensive EmOC include 24-hour cesarean delivery and blood  
56  
57  
58  
59  
60



1  
2  
3 transfusion availability.[26] Notably, these standards were not met by this regional hospital.

4  
5 Typical obstacles to the delivery of Comprehensive EmOC in the region include human resource  
6  
7 shortages, intermittent electricity supplied exclusively by generator, and scarcity of donated  
8  
9 blood that often necessitates donations from the patient's family at the time of the operation.

10  
11  
12  
13 Limitations of our study included non-randomized sampling of participants in community  
14  
15 interviews. In fact, convenience recruitment in proximate communities with active hospital  
16  
17 outreach programs in maternal and child health may have over-represented "health-seekers"  
18  
19 and women with access to hospital services, or skewed the sample population in unknown ways  
20  
21 by excluding women who were not at home when interviewers visited. Unfortunately we do not  
22  
23 have data from communities without hospital outreach programs for comparison. In addition,  
24  
25 refusal to participate among women approached was not documented consistently by survey  
26  
27 administrators so we are unable to accurately report on this figure. Finally, the hospital-based  
28  
29 portion of our study was limited by poor medical record keeping and organization, and missing  
30  
31 data, particularly pertaining to "history of present illness," a key timeline necessary to evaluate  
32  
33 the dynamic causes of birth complications in the context of home- and facility-delivery.  
34  
35  
36  
37

38  
39 In summary, the combination of community and facility data enabled us to identify deficiencies  
40  
41 in the utilization of maternal health services in north-central Liberia. Many women in need of  
42  
43 such services did not access them, even if care was available locally. Additionally, there was a  
44  
45 high rate of serious complications among women presenting to the hospital for cesarean  
46  
47 delivery. Greater outreach and referral services as well as education among women and TM are  
48  
49 needed to improve timely utilization of care. Our study also highlights the importance of  
50  
51 performing local assessments of maternal health services in order to accurately measure  
52  
53 community needs that otherwise may be underestimated by national surveys. These  
54  
55  
56  
57  
58  
59  
60

1  
2  
3 geographically focused evaluations are critical to inform policy and programmatic interventions  
4  
5 at the community level.  
6  
7

8  
9 **FUNDING:**

10  
11 Funded by Office of the Dean, Vanderbilt University School of Medicine (Emphasis  
12  
13 Program) and the Vanderbilt Institute for Global Health  
14  
15

16  
17  
18 **CONTRIBUTORSHIP:**

19  
20 All authors were involved in the design of the study, the analysis of data, and the writing  
21  
22 and editing of this paper. MGG conducted interviews with participants. All authors had  
23  
24 full access to all the data in the study and can take responsibility for the integrity of the  
25  
26 data and the accuracy of the data analysis. MGG wrote the first draft of the paper, and all  
27  
28 authors made important intellectual contributions to the content and approved the final  
29  
30 version.  
31  
32  
33  
34  
35  
36

37 **COMPETING INTERESTS:**

38  
39 There are no competing interests .  
40  
41  
42  
43

44 **DATA SHARING STATEMENT:**

45  
46 There is no additional unpublished data available.  
47  
48  
49  
50  
51  
52  
53  
54  
55  
56  
57  
58  
59  
60

**Table 1.** Interview responses of women (n=307)<sup>\*</sup> interviewed in their homes in rural northern Liberia in 2010

| Characteristic                                                              | Value      |
|-----------------------------------------------------------------------------|------------|
| <b>Age<sup>*</sup></b> , mean years (SD)                                    | 30.5 (7.5) |
| <b>Parity<sup>*</sup></b> , mean no. (SD)                                   | 4.8 (3.0)  |
| <b>Education level</b> , no. (%)                                            |            |
| No formal education                                                         | 174 (57.1) |
| Some primary                                                                | 114 (37.4) |
| Completed primary or greater                                                | 17 (5.6)   |
| <b>Relationship status</b> , no. (%)                                        |            |
| Married                                                                     | 223 (72.6) |
| Unmarried                                                                   | 84 (27.4)  |
| <b>Lost a child during prior pregnancy</b> , no. (%)                        |            |
| Yes                                                                         | 113 (37.0) |
| No                                                                          | 192 (63.0) |
| <b>Site of delivery in immediate prior pregnancy</b> , no. (%) <sup>†</sup> |            |
| Hospital                                                                    | 47 (16.8)  |
| Home with traditional midwife (TM)                                          | 210 (75.0) |
| Home without TM                                                             | 23 (8.2)   |
| <b>Why did you choose to deliver your child in this place?</b> <sup>†</sup> |            |
| <b>Home</b> , no. (%)                                                       |            |
| 'Cost' or 'Difficulty with transport'                                       | 69 (31.5)  |
| 'Quick onset of labor'                                                      | 67 (30.6)  |

|                                  |           |
|----------------------------------|-----------|
| 'Family tradition' or 'Religion' | 37 (16.9) |
| 'TM is safe'                     | 37 (16.9) |
| 'Conflict' or 'Flooding'         | 8 (3.7)   |
| <b>Hospital, no. (%)</b>         |           |
| 'Labor complications at home'    | 26 (57.8) |
| 'Hospital nearby'                | 6 (13.3)  |
| 'Antenatal referral'             | 5 (11.1)  |
| 'Hospital is safer'              | 5 (11.1)  |
| 'Previous Cesarean delivery'     | 3 (6.7)   |

\* Totals may not add to 307 due to missing values. 280 respondents reported age. 305 respondents reported parity.

† N=280 excluding nulliparous women

**Table 2.** Comparison of characteristics of rural Liberian women who reported delivering their last child at home or in hospital, excluding nulliparous women (n=280)

| Characteristic                                      | HOME       | HOSPITAL   | P-value |
|-----------------------------------------------------|------------|------------|---------|
| <b>Age, mean years (SD)</b>                         | 30.9 (7.3) | 29.6 (8.3) | 0.29    |
| <b>Parity, mean no. (SD)</b>                        | 4.9 (2.9)  | 4.5 (3.2)  | 0.32    |
| <b>Education level, no. (%)</b>                     |            |            |         |
| None                                                | 139 (59.9) | 20 (43.5)  | 0.057   |
| Some primary                                        | 84 (36.2)  | 22 (47.8)  |         |
| Completed primary or greater                        | 9 (3.9)    | 4 (8.7)    |         |
| <b>Relationship status, no. (%)</b>                 |            |            |         |
| Married                                             | 168 (72.1) | 33 (70.2)  | 0.86    |
| Unmarried                                           | 65 (27.9)  | 14 (29.8)  |         |
| <b>Lost a child during prior pregnancy, no. (%)</b> |            |            |         |
| Yes                                                 | 86 (36.9)  | 18 (38.3)  | 0.87    |
| No                                                  | 147 (63.1) | 29 (61.7)  |         |

## References

- 1 Hogan MC, Foreman KJ, Naghavi M, *et al.* Maternal mortality for 181 countries, 1980-2008: a systematic analysis of progress towards Millennium Development Goal 5. *Lancet* 2010;**375**:1609–23.
- 2 Hill K, Thomas K, AbouZahr C, *et al.* Estimates of maternal mortality worldwide between 1990 and 2005: an assessment of available data. *Lancet* 2007;**370**:1311–9.

- 3 WHO, UNICEF, UNFPA, *et al.* Trends in Maternal Mortality: 1990 to 2010: WHO, UNICEF, UNFPA and The World Bank estimates. 2012;;1–70.
- 4 Farooqi S. The World Health Report 2005: Make Every Mother and Child Count. *World Health Organization* 2005.
- 5 Campbell OMR, Graham WJ, Lancet Maternal Survival Series steering group. Strategies for reducing maternal mortality: getting on with what works. *Lancet* 2006;**368**:1284–99.
- 6 *The Millennium Development Goals Report*. New York, 2006: : United Nations Department of Economic and Social Affairs 2006.
- 7 Freedman LP, Graham WJ, Brazier E, *et al.* Practical lessons from global safe motherhood initiatives: time for a new focus on implementation. *Lancet* 2007;**370**:1383–91.
- 8 Friberg IK, Kinney MV, Lawn JE, *et al.* Sub-Saharan Africa's Mothers, Newborns, and Children: How Many Lives Could Be Saved with Targeted Health Interventions? *PLoS Med* 2010;**7**:e1000295.
- 9 Kinney MV, Kerber KJ, Black RE, *et al.* Sub-Saharan Africa's Mothers, Newborns, and Children: Where and Why Do They Die? *PLoS Med* 2010;**7**:e1000294.
- 10 Lori JR, Starke AE. A critical analysis of maternal morbidity and mortality in Liberia, West Africa. *Midwifery* 2012;**28**:67–72.
- 11 AbouZahr C. New estimates of maternal mortality and how to interpret them: choice or confusion? *Reprod Health Matters* 2011;**19**:117–28.
- 12 Liberia: Demographic and Health Survey 2007. *Ministry of Health and Social Welfare* 2007.
- 13 Wylie BJ, Mirza FG. Cesarean delivery in the developing world. *Clin Perinatol* 2008;**35**:571–82, xii.
- 14 Urassa D, Carlstedt A, Nyström L. Are Process Indicators Adequate to Assess Essential Obstetric Care at District Level? — A Case Study from Rufiji District, Tanzania. *African Journal of Reproductive Health* 2005;**9**:100–11.
- 15 Hatt L, Stanton C, Makowiecka K. Did the strategy of skilled attendance at birth reach the poor in Indonesia? *Bull World Health Organ* 2007;**85**:774–82.
- 16 Shah A, Fawole B, M'Imunya JM, *et al.* Cesarean delivery outcomes from the WHO global survey on maternal and perinatal health in Africa. *Int J Gynecol Obstet* 2009;**107**:191–7.
- 17 Kidney E, Winter H, Khan K. Systematic review of effect of community-level interventions to reduce maternal mortality. *BMC Pregnancy Childbirth* 2009;**9**.
- 18 *Human Development Report:2010*. New York: : United Nation Development Programme 2010.

- 1  
2  
3 19 Cheng MH. Reviving health care in Liberia. *Lancet* 2009;**373**:1239–40.  
4  
5  
6 20 *World health statistics: 2009*. Geneva: : World Health Organization 2009.  
7  
8 21 Kruk ME, Rockers PC, Varpilah ST, *et al*. Which doctor?: Determinants of utilization of  
9 formal and informal health care in postconflict Liberia. *Med Care* 2011;**49**:585–91.  
10  
11 22 Stanton C, Holtz S. Levels and trends in cesarean birth in the developing world. *Studies in*  
12 *Family Planning* 2011;**37**:41–8.  
13  
14 23 Thaddeus S, Maine D. Too far to walk: maternal mortality in context. *Soc Sci Med*  
15 1994;**38**:1091–110.  
16  
17  
18 24 Mbaruku G, van Roosmalen J, Kimondo I, *et al*. Perinatal audit using the 3-delays model in  
19 western Tanzania. *International Journal of Gynecology and Obstetrics* 2009;**106**:85–8.  
20  
21 25 Stanton C, Ronsmans C, Baltimore Group on Cesarean. Recommendations for routine  
22 reporting on indications for cesarean delivery in developing countries. *Birth* 2008;**35**:204–  
23 11.  
24  
25 26 Bailey P, Paxton A, Lobis S, *et al*. The availability of life-saving obstetric services in  
26 developing countries: An in-depth look at the signal functions for emergency obstetric  
27 care. *Int J Gynecol Obstet* 2006;**93**:285–91.  
28  
29  
30  
31  
32  
33  
34  
35  
36  
37  
38  
39  
40  
41  
42  
43  
44  
45  
46  
47  
48  
49  
50  
51  
52  
53  
54  
55  
56  
57  
58  
59  
60

## INTRODUCTION

In 2008 an estimated 342,900 women died in childbirth worldwide.[1] A vast global disparity exists, with more than 99% of maternal deaths taking place in low and middle-income countries (LMIC). The maternal mortality ratio (MMR) represents the number of maternal deaths per 100,000 live births. MMR has decreased in Asia and Latin America in the past two decades, but has remained near-constant in sub-Saharan Africa.[1-3] According to the World Health Organization (WHO), most maternal deaths could be prevented with ready access to adequate obstetric services.[4,5] Millennium Development Goal 5 calls for a three-quarters reduction in MMR globally by 2015. Strides have been made toward this target; however, large-scale international programs have not reduced maternal mortality significantly in areas of the world that bear the greatest burden.[1,6,7]

Programs to reduce maternal mortality must consider the local context of maternal mortality and access to maternal health services if they are to be effective.[7-9] Recent efforts to improve the measurement of maternal mortality globally have yielded more accurate and complete data.[1] Still, there is a paucity of primary community information in many countries with the highest MMR, such as Liberia.[1,3,10,11] In addition, a high degree of variability in MMR and access to maternal care exists within communities.[12,13]

In areas with high maternal mortality and poor information systems [where data on maternal mortality are not available](#), process indicators [related to this outcome](#) can be highly informative to evaluate the unmet need for maternal health care. [Process indicators for maternal mortality include the proportion of women who deliver in a health facility under skilled attendance and the rate of cesarean delivery.](#)[14-16] [These indicators are easier to capture partly because maternal death is difficult to ascertain, especially in rural areas, or may occur in small catchment](#)



1  
2  
3  
4  
5  
6  
7  
8 ~~areas with low numbers over a short evaluation timespan.~~<sup>[17]</sup> ~~Direct measurement of service~~  
9 ~~delivery includes the proportion of women who deliver in a health facility under skilled~~  
10 ~~attendance and the rate of cesarean delivery.~~<sup>[15-17]</sup> ~~These indicators are easier to capture than~~  
11 ~~MMR partly because maternal death is difficult to ascertain, especially in rural areas, or may~~  
12 ~~occur in small catchment areas with low numbers over a short evaluation timespan.~~<sup>[17]</sup>  
13  
14  
15  
16  
17

18 Liberia ~~was the setting for our study and~~ is among the poorest countries in the world; it has one  
19 of the ten highest national MMR of any nation.<sup>[18]</sup> Hogan and colleagues estimated MMR in  
20 Liberia to be 859 (uncertainty interval, 547-1287) maternal deaths per 100,000 live births in  
21 2008.<sup>[1]</sup> By comparison, the MMR in Ghana, among the lowest in the region, was 409 (248-633),  
22 and in neighbor Sierra Leone, it was 1033 (635-1627), the region's highest. The wide uncertainty  
23 intervals are reflective of the relative lack of data captured by poor health information systems  
24 in Liberia, which is still recovering from a 14-year civil war that ended in 2003. Health  
25 infrastructure and human resources were decimated during that span. In 2009, the country was  
26 estimated to have a deficit of 10,000 health care workers.<sup>[19]</sup> The ~~2007 Liberia Demographic~~  
27 ~~and Health Survey 2009 World Health Statistics report~~ confirms a corresponding gap in access to  
28 essential services, citing only 46% of women in Liberia deliver under skilled attendance in health  
29 facilities.<sup>[12]</sup> ~~[20]~~ In addition, the national cesarean delivery rate in 2007 was 3.5%, and <1.0% in  
30 rural parts of the country.<sup>[12,20]</sup> As Liberia rebuilds its health infrastructure and targets  
31 maternal mortality, community-level research is needed to appropriately direct maternal health  
32 interventions. ~~[21]~~  
33  
34  
35  
36  
37  
38  
39  
40  
41  
42  
43  
44  
45  
46

47 The objective of this study was to characterize utilization of maternal health services, including  
48 facility delivery and cesarean delivery, in rural north-central Liberia and describe the motives of  
49 women seeking or not seeking facility-based care.  
50  
51  
52  
53  
54  
55  
56  
57  
58  
59  
60

## METHODS

We conducted a cross-sectional study employing a structured interview in a community setting, as well as a review of medical records at the local hospital. The individual structured interview comprised of questions on the behavior and attitudes of women regarding maternal health care.

Eight communities were chosen based on the presence of existing outreach programs [for antenatal education and childhood immunizations](#) for a regional hospital in Nimba County, located in north-central Liberia. All communities were within 15 km of the hospital. More than 95% of the county's 462,000 residents live in a rural setting.[12]

All women between the ages of 15-49 years were eligible, consonant with age sampling of the 2007 Liberia Demographic and Health Survey.[12] Women were approached for participation in their homes [or in other public spaces such as community meeting places](#). All households [and public locations](#) in each village were visited once, resulting in a convenience sample given absenteeism. Community health workers were trained to conduct 25-minute standardized interviews. Questions in English were designed in collaboration with clinicians, public health technicians, and community health workers in Liberia. Interviews were conducted orally in English or Mano, a language spoken in the region, as per a participant's preference. The interviewers were trained to record responses including multiple answers given to open-ended questions. Responses were coded by a member of the research team. Verbal informed consent was obtained from all participants. Women received a small non-monetary compensation (value≈US\$2) for their time.

The review of medical records involved a retrospective evaluation of all deliveries at a regional hospital in Nimba County using general medical and operating room records. Data were

1  
2  
3  
4  
5  
6  
7  
8 extracted on method of delivery, incidence of stillbirth, and maternal and fetal indications for  
9 cesarean delivery. Extraction was performed by a hospital data officer and a medical student.

### 12 **Statistical analysis**

14  
15 Participant responses were analyzed for frequencies, means, and standard deviations as  
16 indicated. Participant characteristics were correlated with their interview responses. Nulliparous  
17 women were excluded from analysis of questions related to prior ~~pregnancies~~deliveries.  
18 Respondents with missing data were dropped from all analyses. Fisher's exact test was used to  
19 evaluate categorical variables and Student's T-test was used for continuous variables. All  
20 analyses were performed with SAS version 9.1.3 (SAS Institute, Cary, NC). Our primary outcomes  
21 of interest were facility delivery rate assessed in the community and ~~c~~Cesarean delivery rate in a  
22 regional hospital.  
23  
24  
25  
26  
27  
28  
29

30  
31 Data were kept anonymous at all times by removing all identifiers. Ethical approval was granted  
32 by the Vanderbilt University Institutional Review Board, and the Medical Director of the Liberian  
33 hospital.  
34  
35

### 37 **RESULTS**

38  
39  
40 Between May 2009 and August 2009, 316 women were approached to participate in community  
41 interviews. Of these 307 (97.2%) met eligibility criteria, consented, and completed the interview.

42  
43 There was 1 (0.3%) documented refusal. Participants had a mean age of 30.5 (SD±7.5)(Table 1).  
44  
45 The ~~median-mean~~ parity was 4.8 (SD±3.0). More than half (n=174, 57.1%) of women reported  
46 having no formal education. There were 6 (2.0%) nulliparous women and 21 (6.8%) who chose  
47 not to answer questions regarding the site of delivery in the immediate prior pregnancy. Of the  
48 remaining 280 women, ~~who reported previous parity~~, 210 (75.0%) reported delivering their  
49  
50  
51  
52  
53  
54  
55  
56  
57  
58  
59  
60

1  
2  
3  
4  
5  
6  
7  
8 previous child at home with a traditional birth attendant/midwife (FBATM) and 23 (8.2%) at  
9 home without a FBATM. Interviewers then asked the open-ended question, “Why did you  
10 choose to deliver your child in this place?” for which multiple responses were accepted.  
11  
12 Responses for those delivering at home included, ‘cost’ or ‘difficulty with transport’ (31.5%),  
13  
14 ‘quick onset of labor’ (30.6%), ‘family tradition’ or ‘religion’ (16.9%), ‘FBATM is safe’ (16.9%),  
15  
16 and ‘conflict’ or ‘flooding’ (3.7%). Women who reported delivering in a hospital responded,  
17  
18 ‘labor complications at home’ (57.8%), ‘hospital nearby’ (13.3%), ‘antenatal referral’ (11.1%)  
19  
20 ‘safety’ (11.1%), and ‘previous cesarean delivery’ (6.7%).  
21  
22

23  
24 In women who reported delivering at home, and those who reported delivering in a hospital,  
25  
26 there was no statistical evidence to suggest a difference in age, parity, relationship status, or  
27  
28 whether a woman reporting losing a child during a previous prior pregnancy (Table 2). Women  
29  
30 who reported delivering at home were less likely to have education at or beyond the primary  
31  
32 level, a result that had borderline statistical significance ( $p=0.057$ ).  
33

34 In a 1-year period between April 2008-March 2009, 949 live births occurred in the study  
35  
36 hospital. In the same period, 82 stillbirths were recorded, 8.0% of total births ( $n=1031$ ). The rate  
37  
38 of cesarean delivery at the hospital was 35.5% ( $n=337$ ). The stillbirth rate in the cesarean subset  
39  
40 was 12.4%. Common indications for cesarean delivery included cephalopelvic disproportion  
41  
42 (50.0%), previous cesarean delivery (12.7%), antepartum hemorrhage due to placenta previa or  
43  
44 placental abruption (10.2%), eclampsia (8.5%), breech presentation (5.0%), and ruptured uterus  
45  
46 (4.2%).  
47

## 48 DISCUSSION

49  
50 In structured interviews conducted in villages proximate to a hospital in Nimba County, Liberia,  
51  
52 only one in six women reported delivering their last child in a hospital, i.e., 83.2% of women  
53  
54  
55  
56  
57  
58  
59  
60

1  
2  
3  
4  
5  
6  
7  
8 reported their last delivery to have been at home. Of women delivering at a regional hospital,  
9  
10 35.5% were by cesarean section and 8.0% were stillborn. These metrics indicate severe  
11  
12 underutilization of timely, supervised, institutional birthing services among women in north-  
13  
14 central Liberia. Participants reported financial and transportation barriers to seeking care, as  
15  
16 well as cultural traditions including the practice of delivery under the care of [a a-TBATM](#).  
17  
18 [\(Traditional midwife is the term used in Liberia, analogous to the traditional birth attendant in](#)  
19  
20 [other nations.\)](#) Further, more than half of women who delivered their last child in a hospital did  
21  
22 do so only after experiencing complications in labor at home. This was validated by the  
23  
24 hospital's high cesarean section rate. These findings [of underutilization of the formal health](#)  
25  
26 [sector](#) are similar to those of a 2011 study in the same region of Liberia that highlighted the  
27  
28 impact of geographic and financial barriers, perceptions of quality in the formal and informal  
29  
30 health care systems, and prevailing care by [TBAs-informal health workers, including TM](#), on the  
31  
32 health care utilization.[21]

33  
34 The rates of hospital delivery in our study were significantly lower than the national (46.3%) and  
35  
36 county (32.6%) statistics reported in 2007 for skilled attendance at delivery, a related metric  
37  
38 used by the WHO and Liberia Ministry of Health to assess women's access to safe maternal  
39  
40 health services.[4,12] Skilled attendance differs from facility delivery in the requirement of  
41  
42 supervision of childbirth by a physician, nurse, trained midwife or physician's assistant.[11] This  
43  
44 is deemed vital to the early recognition of life-threatening intrapartum complications, and their  
45  
46 effective management.[5,14] While hospital delivery is a prerequisite for skilled attendance in  
47  
48 Liberia where home deliveries are rarely supervised by a professional in the above cadres, it is  
49  
50 not necessarily true that all hospital deliveries have the appropriate personnel present.  
51  
52 Therefore, our measured rates of facility delivery potentially overestimate the true figure for  
53  
54 safe delivery under skilled attendance among the participants.  
55  
56  
57  
58  
59  
60

1  
2  
3  
4  
5  
6  
7  
8  
9  
10  
11  
12  
13  
14  
15  
16  
17  
18  
19  
20  
21  
22  
23  
24  
25  
26  
27  
28  
29  
30  
31  
32  
33  
34  
35  
36  
37  
38  
39  
40  
41  
42  
43  
44  
45  
46  
47  
48  
49  
50  
51  
52  
53  
54  
55  
56  
57  
58  
59  
60

The definition for skilled attendants notably excludes ~~TBAs-TM~~ because they do not have access to resources for medical or surgical management of labor.[4] Women under ~~TBA-TM~~ care who have conditions such as dystocia, eclampsia, or bleeding are exceedingly vulnerable. In addition, ~~TBAs-TM~~ have limited training in the recognition of complications, and in the study community there were no formal mechanisms for timely referral if complications arose.[10] ~~Actually, only 16.9% believed that a delivery with a TBA was safe, a finding similar to a previous study in east Africa.[22]~~

When we compared women who delivered their last child at home to those who delivered in a hospital, only education differed; home-delivered women were more likely to report having no formal education. Previous studies have demonstrated the alarming inequalities in access to maternal health care based on education levels, as well as wealth, rural ~~ityvenue~~, and religion.[7,13,22]

In our review of hospital medical and operating room records we found that cesarean delivery accounted for more than a third of all deliveries, though there were relatively few births at the facility in the study period. The hospital serves a region of approximately 250,000 people where nearly 10,000 births were expected annually.[12] ~~Additionally it is the only facility within a 35km radius with capacity to provide cesarean delivery service.~~ While smaller health facilities ~~in the region equipped to offer assisted vaginal delivery~~ may provide services in a portion of ~~births in these the catchment area~~births, the delivery number at the study site is still very low and reflects the trend toward home delivery found in interviews.

In addition, the high rate of cesarean delivery may stem from referral of complicated cases from other facilities and late presentation after attempted home delivery.[23,24] Prolonged labor, antepartum hemorrhage, and ruptured uterus were the common antecedents to cesarean

1  
2  
3  
4  
5  
6  
7  
8 delivery.[25] Unfortunately, we were not able to ascertain the duration of labor, location where  
9 labor was initiated, and delays in accessing care. Prior research in the region using the “three-  
10 delays” model found significant delays at all three stages — deciding to seek care, reaching a  
11 health facility, and receiving needed care at the facility.[10,23] These prior studies similarly  
12 highlighted the importance of family and ~~TBA-TM~~ influence on timely access to care.

13  
14  
15  
16  
17  
18 Cesarean delivery is cited as a life-saving component of Comprehensive Emergency Obstetric  
19 Care (EmOC).[16] Criteria for Comprehensive EmOC include 24-hour cesarean delivery and blood  
20 transfusion availability.[26] ~~Notably, these~~ standards ~~were~~ not met by this regional hospital.~~{27}~~  
21  
22 ~~Typical~~ ~~Obstacles~~ to the delivery of Comprehensive EmOC ~~in the region~~ included human  
23 resource shortages, intermittent electricity supplied exclusively by generator, and scarcity of  
24 donated blood that often necessitates ~~sd~~ donations from the patient’s family at the time of the  
25 operation.

26  
27  
28  
29  
30  
31  
32 Limitations of our study included non-randomized sampling of participants in community  
33 interviews. In fact, convenience recruitment in proximate communities with active hospital  
34 outreach programs ~~in maternal and child health~~ may have over-represented “health-seekers”  
35 and women with access to hospital services, or skewed the sample population in unknown ways  
36 by excluding women who were not at home when interviewers visited. ~~Unfortunately we do not~~  
37 ~~have data from communities without hospital outreach programs for comparison. In addition,~~  
38 ~~refusal to participate among women approached was not documented consistently by survey~~  
39 ~~administrators so we are unable to accurately report on this figure.- Finally, the hospital-based~~  
40 ~~portion of our study was limited by poor medical record keeping and organization, and missing~~  
41 ~~data~~ Additionally, the hospital-based portion of our study was limited by poor data quality,  
42  
43  
44  
45  
46  
47  
48  
49  
50  
51  
52  
53  
54  
55  
56  
57  
58  
59  
60

1  
2  
3  
4  
5  
6  
7  
8 particularly pertaining to “history of ~~the~~ present illness,” a key timeline necessary to evaluate  
9 the dynamic causes of birth complications in the context of home- and facility-delivery.  
10  
11

12 ~~In summary, in summary, it~~ the combination of community and facility data enabled us to  
13 ~~identify report on~~ deficiencies in the utilization of maternal health services in north-central  
14 Liberia. Many women in need of such services did not access them, even if care was available  
15 locally. Additionally, there was a high rate of serious complications among women presenting to  
16 the hospital for cesarean delivery. Greater outreach and referral services as well as education  
17 among women and ~~TM traditional birth attendants~~ are needed to improve timely utilization of  
18 care. Our study also highlights the importance of performing local assessments of maternal  
19 health services in order to accurately measure community needs that otherwise may be  
20 underestimated by national surveys. These geographically focused evaluations are critical to  
21 inform policy and programmatic interventions at the community level.  
22  
23  
24  
25  
26  
27  
28  
29  
30  
31  
32  
33  
34  
35  
36  
37  
38  
39  
40  
41  
42  
43  
44  
45  
46  
47  
48  
49  
50  
51  
52  
53  
54  
55  
56  
57  
58  
59  
60



**Table 1.** Interview responses of women (n=307)\* interviewed in their homes in rural northern Liberia in 2010

| Characteristic                                                              | Value      |
|-----------------------------------------------------------------------------|------------|
| <b>Age</b> <sup>‡</sup> , mean years (SD)                                   | 30.5 (7.5) |
| <b>Parity</b> <sup>‡</sup> , mean no. (SD)                                  | 4.8 (3.0)  |
| <b>Education level</b> , no. (%)                                            |            |
| No formal education                                                         | 174 (57.1) |
| Some primary                                                                | 114 (37.4) |
| Completed primary or greater                                                | 17 (5.6)   |
| <b>Relationship status</b> , no. (%)                                        |            |
| Married                                                                     | 223 (72.6) |
| Unmarried                                                                   | 84 (27.4)  |
| <b>Lost a child during prior pregnancy</b> , no. (%)                        |            |
| Yes                                                                         | 113 (37.0) |
| No                                                                          | 192 (63.0) |
| <b>Site of delivery in immediate prior pregnancy</b> , no. (%) <sup>†</sup> |            |
| Hospital                                                                    | 47 (16.8)  |
| Home with traditional midwife (TM)                                          | 210 (75.0) |
| Home without TM                                                             | 23 (8.2)   |
| <b>Why did you choose to deliver your child in this place?</b> <sup>†</sup> |            |
| Home, no. (%)                                                               |            |
| 'Cost' or 'Difficulty with transport'                                       | 69 (31.5)  |

1  
2  
3  
4  
5  
6  
7  
8  
9  
10  
11  
12  
13  
14  
15  
16  
17  
18  
19  
20  
21  
22  
23  
24  
25  
26  
27  
28  
29  
30  
31  
32  
33  
34  
35  
36  
37  
38  
39  
40  
41  
42  
43  
44  
45  
46  
47  
48  
49  
50  
51  
52  
53  
54  
55  
56  
57  
58  
59  
60

|                                  |           |
|----------------------------------|-----------|
| 'Quick onset of labor'           | 67 (30.6) |
| 'Family tradition' or 'Religion' | 37 (16.9) |
| 'TM is safe'                     | 37 (16.9) |
| 'Conflict' or 'Flooding'         | 8 (3.7)   |
| <b>Hospital, no. (%)</b>         |           |
| 'Labor complications at home'    | 26 (57.8) |
| 'Hospital nearby'                | 6 (13.3)  |
| 'Antenatal referral'             | 5 (11.1)  |
| 'Hospital is safer'              | 5 (11.1)  |
| 'Previous Cesarean delivery'     | 3 (6.7)   |

\* Totals may not add to 307 due to missing values. [280 respondents reported age. 305 respondents reported parity.](#)

<sup>†</sup>N=280 excluding nulliparous women

Formatted: Line spacing: single

review only

**Table 2.** Comparison of characteristics of rural Liberian women who reported delivering their last child at home or in hospital, excluding nulliparous women (n=280)

| Characteristic                                                               | HOME       | HOSPITAL   | P-value |
|------------------------------------------------------------------------------|------------|------------|---------|
| <b>Age</b> , mean years (SD)                                                 | 30.9 (7.3) | 29.6 (8.3) | 0.29    |
| <b>Parity</b> , mean no. (SD)                                                | 4.9 (2.9)  | 4.5 (3.2)  | 0.32    |
| <b>Education level</b> , no. (%)                                             |            |            |         |
| None                                                                         | 139 (59.9) | 20 (43.5)  | 0.057   |
| Some primary                                                                 | 84 (36.2)  | 22 (47.8)  |         |
| Completed primary or greater                                                 | 9 (3.9)    | 4 (8.7)    |         |
| <b>Relationship status</b> , no. (%)                                         |            |            |         |
| Married                                                                      | 168 (72.1) | 33 (70.2)  | 0.86    |
| Unmarried                                                                    | 65 (27.9)  | 14 (29.8)  |         |
| <b>Lost a child during <u>prior pregnancy-or-childbirth</u></b> ,<br>no. (%) |            |            |         |
| Yes                                                                          | 86 (36.9)  | 18 (38.3)  | 0.87    |
| No                                                                           | 147 (63.1) | 29 (61.7)  |         |

#### References

- Hogan MC, Foreman KJ, Naghavi M, *et al.* Maternal mortality for 181 countries, 1980-2008: a systematic analysis of progress towards Millennium Development Goal 5. *Lancet* 2010;**375**:1609–23.
- Hill K, Thomas K, AbouZahr C, *et al.* Estimates of maternal mortality worldwide between

- 1990 and 2005: an assessment of available data. *Lancet* 2007;**370**:1311–9.
- 3 WHO, UNICEF, UNFPA, *et al.* Trends in Maternal Mortality: 1990 to 2010: WHO, UNICEF, UNFPA and The World Bank estimates. 2012;:1–70.
- 4 Farooqi S. The World Health Report 2005: Make Every Mother and Child Count. *World Health Organization* 2005.
- 5 Campbell OMR, Graham WJ, Lancet Maternal Survival Series steering group. Strategies for reducing maternal mortality: getting on with what works. *Lancet* 2006;**368**:1284–99.
- 6 *The Millennium Development Goals Report*. New York, 2006: : United Nations Department of Economic and Social Affairs 2006.
- 7 Freedman LP, Graham WJ, Brazier E, *et al.* Practical lessons from global safe motherhood initiatives: time for a new focus on implementation. *Lancet* 2007;**370**:1383–91.
- 8 Friberg IK, Kinney MV, Lawn JE, *et al.* Sub-Saharan Africa's Mothers, Newborns, and Children: How Many Lives Could Be Saved with Targeted Health Interventions? *PLoS Med* 2010;**7**:e1000295.
- 9 Kinney MV, Kerber KJ, Black RE, *et al.* Sub-Saharan Africa's Mothers, Newborns, and Children: Where and Why Do They Die? *PLoS Med* 2010;**7**:e1000294.
- 10 Lori JR, Starke AE. A critical analysis of maternal morbidity and mortality in Liberia, West Africa. *Midwifery* 2012;**28**:67–72.
- 11 AbouZahr C. New estimates of maternal mortality and how to interpret them: choice or confusion? *Reprod Health Matters* 2011;**19**:117–28.
- 12 Liberia: Demographic and Health Survey 2007. *Ministry of Health and Social Welfare* 2007.
- 13 Wylie BJ, Mirza FG. Cesarean delivery in the developing world. *Clin Perinatol* 2008;**35**:571–82, xii.
- 14 Urassa D, Carlstedt A, Nyström L. Are Process Indicators Adequate to Assess Essential Obstetric Care at District Level? — A Case Study from Rufiji District, Tanzania. *African Journal of Reproductive Health* 2005;**9**:100–11.
- 15 Hatt L, Stanton C, Makowiecka K. Did the strategy of skilled attendance at birth reach the poor in Indonesia? *Bull World Health Organ* 2007;**85**:774–82.
- 16 Shah A, Fawole B, M'Imunya JM, *et al.* Cesarean delivery outcomes from the WHO global survey on maternal and perinatal health in Africa. *Int J Gynecol Obstet* 2009;**107**:191–7.
- 17 Kidney E, Winter H, Khan K. Systematic review of effect of community-level interventions to reduce maternal mortality. *BMC Pregnancy Childbirth* 2009;**9**.
- 18 *Human Development Report:2010*. New York: : United Nation Development Programme

- 1  
2  
3  
4  
5  
6  
7  
8 2010.  
9  
10 19 Cheng MH. Reviving health care in Liberia. *Lancet* 2009;**373**:1239–40.  
11  
12 20 *World health statistics: 2009*. Geneva: : World Health Organization 2009.  
13  
14 21 Kruk ME, Rockers PC, Varpilah ST, *et al*. Which doctor?: Determinants of utilization of  
15 formal and informal health care in postconflict Liberia. *Med Care* 2011;**49**:585–91.  
16  
17 22 Stanton C, Holtz S. Levels and trends in cesarean birth in the developing world. *Studies in*  
18 *Family Planning* 2011;**37**:41–8.  
19  
20 23 Thaddeus S, Maine D. Too far to walk: maternal mortality in context. *Soc Sci Med*  
21 1994;**38**:1091–110.  
22  
23 24 Mbaruku G, van Roosmalen J, Kimondo I, *et al*. Perinatal audit using the 3-delays model in  
24 western Tanzania. *International Journal of Gynecology and Obstetrics* 2009;**106**:85–8.  
25  
26 25 Stanton C, Ronsmans C, Baltimore Group on Cesarean. Recommendations for routine  
27 reporting on indications for cesarean delivery in developing countries. *Birth* 2008;**35**:204–  
28 11.  
29  
30 26 Bailey P, Paxton A, Lobis S, *et al*. The availability of life-saving obstetric services in  
31 developing countries: An in-depth look at the signal functions for emergency obstetric  
32 care. *Int J Gynecol Obstet* 2006;**93**:285–91.  
33  
34  
35  
36  
37  
38  
39  
40  
41  
42  
43  
44  
45  
46  
47  
48  
49  
50  
51  
52  
53  
54  
55  
56  
57  
58  
59  
60
